# Supplementary material for: Pan-cancer genomic analysis shows hemizygous PTEN loss tumors are associated with immune evasion and poor outcome
Source: Springer Nature journal article supplement (doi:10.1038/s41598-023-31759-6), 2023-03-28
Supplement: MOESM2 [file 41598_2023_31759_MOESM2_ESM.pdf]

Supplementary Table 1

| PTEN_SCNA_status | TP53        |             | $\chi^2$ | p-value |
|------------------|-------------|-------------|----------|---------|
|                  | Mut         | WT          |          |         |
| HemDel           | 1343        | 1155        | 448.49   | < 0.001 |
| HomDel           | 194         | 223         |          |         |
| Intact           | 1786        | 4206        |          |         |
| <b>Total</b>     | <b>3323</b> | <b>5584</b> |          |         |

**Supplementary Table 1.** A chi-square test of independence showed that there was a significant association between *PTEN* status and somatic mutation status of *TP53*,  $\chi^2$  (2, N = 7866) = 448.4,  $p = < 0.001$ . *TP53* mutation status was more likely than *TP53* WT in PTEN HemDel.

Supplementary Table 2

a)

| Variable               | PanCancer (OS)      |         |
|------------------------|---------------------|---------|
|                        | HR (95% CI)         | p*      |
| <b>PTEN CNA + TP53</b> |                     |         |
| Intact + WT            | -                   | -       |
| Intact + MonAll        | 2.07 (1.86 to 2.3)  | p<0.001 |
| Intact + BiAll         | 1.39 (1.06 to 0.0)  | 0.019   |
| HomDel + WT            | 2.09 (1.68 to 2.6)  | p<0.001 |
| HomDel + MonAll        | 1.55 (1.19 to 2.02) | 0.001   |
| HomDel + BiAll         | 3.79 (1.7 to 8.46)  | 0.001   |
| HemDel + WT            | 2.67 (2.41 to 2.95) | p<0.001 |
| HemDel + MonAll        | 2.36 (2.12 to 2.63) | p<0.001 |
| HemDel + BiAll         | 2.84 (2.17 to 3.72) | p<0.001 |

b)

| Variable               | HNSC (OS)           |       |
|------------------------|---------------------|-------|
|                        | HR (95% CI)         | p*    |
| <b>PTEN CNA + TP53</b> |                     |       |
| Intact + WT            | -                   | -     |
| Intact + MonAll        | 1.90 (1.29 to 2.81) | 0.001 |
| Intact + BiAll         | 1.59 (0.91 to 2.55) | 0.10  |
| HomDel + WT            | 1.6 (0.00 to -)     | -     |
| HomDel + MonAll        | 0.78 (0.10 to 5.7)  | 0.8   |
| HomDel + BiAll         | 4.14 (0.57 to 30.2) | 0.16  |
| HemDel + WT            | 1.99 (0.99 to 4.01) | 0.053 |
| HemDel + MonAll        | 1.67 (1.08 to 2.6)  | 0.023 |
| HemDel + BiAll         | 1.47 (0.65 to 3.29) | 0.35  |

**Supplementary Table 2.** Cox Model analysis of overall survivor for the co-occurrence of *TP53* mutation and *PTEN* SCNA. **(A)** *PTEN* HemDel and *TP53* monoallelic mutation tumors are associated with similar hazard ratio levels across the entire TCGA cohort **(B)** Head and neck tumors also showed that *PTEN* HemDel and *TP53* monoallelic mutation exhibited similar hazard ratios. HR, Hazard Ratio; *TP53* MonAll, monoallelic loss for *TP53*; BiAll, biallelic loss for *TP53*.

Supplementary table 3

| Tumor type    | HemDel | HomDel | Int  | DE Genes<br>(HemDel vs<br>Intact) |       | DE Genes<br>(HomDel vs Intact) |       |
|---------------|--------|--------|------|-----------------------------------|-------|--------------------------------|-------|
|               |        |        |      | Up                                | Down  | Up                             | Down  |
| Brain         | 235    | 22     | 406  | 3562                              | 10902 | 4106                           | 7332  |
| Colorectal    | 86     | 16     | 319  | 1086                              | 1536  | 23                             | 175   |
| Cervix        | 74     | 14     | 186  | 728                               | 649   | 743                            | 512   |
| Head and Neck | 117    | 13     | 329  | 1727                              | 1842  | 444                            | 1148  |
| Prostate      | 73     | 85     | 324  | 2076                              | 2966  | 3304                           | 3835  |
| Sarcoma       | 120    | 15     | 106  | 2032                              | 3725  | 241                            | 708   |
| Stomach       | 90     | 20     | 256  | 3216                              | 2814  | 683                            | 1434  |
|               | 795    | 185    | 1926 | 14427                             | 24432 | 9544                           | 15144 |

**Supplementary Table 3.** The number of differentially expressed genes (DEGs) comparing HemDel and HomDel to intact in seven solid tumors. FDR < 0.05. *PTEN* deletion status: HemDel: *PTEN* hemizygous deletion. HomDel: *PTEN* homozygous deletion. Int: *PTEN* intact. FDR, False discovery rate.
